1 **Title**

2 **Full title**

3 The *Plasmodium falciparum* cytoplasmic translation apparatus: a promising therapeutic target not yet  
4 exploited by clinically approved antimalarials.

5 **Short title**

6 Inhibition of the *Plasmodium falciparum* translation apparatus

7

8 **Authors**

9 Christine Moore Sheridan<sup>1</sup>, Valentina E. Garcia<sup>1</sup>, Vida Ahyong<sup>1</sup>, Joseph L. DeRisi<sup>1,2</sup>

10 <sup>1</sup>Department of Biochemistry and Biophysics, University of California, San Francisco, CA, United States

11 <sup>2</sup>Chan Zuckerberg Biohub, San Francisco, CA, United States

12

13 **Abstract**

14 The continued specter of resistance to existing antimalarials necessitates the pursuit of novel targets  
15 and mechanisms of action for drug development. One class of promising targets consists of the 80S ribosome  
16 and its associated components comprising the parasite translational apparatus. Development of translation-  
17 targeting therapeutics requires a greater understanding of protein synthesis and its regulation in the malaria  
18 parasite. Research in this area has been limited by the lack of appropriate experimental methods, particularly a  
19 direct measure of parasite translation. We have recently developed and optimized the PfIVT assay, an *in vitro*  
20 method directly measuring translation in whole-cell extracts from the malaria parasite *Plasmodium*  
21 *falciparum*. Here, we present an extensive pharmacologic assessment of the PfIVT assay using a wide range  
22 of known inhibitors, demonstrating its utility for studying activity of both ribosomal and non-ribosomal  
23 elements directly involved in translation. We further demonstrate the superiority of this assay over a

24 historically utilized indirect measure of translation, S35-radiolabel incorporation. Additionally, we utilize the  
25 PfIVT assay to investigate a panel of clinically approved antimalarial drugs, many with unknown or unclear  
26 mechanisms of action, and show that none inhibit translation, reaffirming *Plasmodium* translation to be a  
27 viable alternative drug target. Within this set, we unambiguously find that mefloquine lacks translation  
28 inhibition activity, despite having been recently mischaracterized as a ribosomal inhibitor. This work exploits  
29 a direct and reproducible assay for measuring *P. falciparum* translation, demonstrating its value in the  
30 continued study of protein synthesis in malaria and its inhibition as a drug target.

31

## 32 **Author summary**

33 Novel antimalarial drugs are required to combat rising resistance to current therapies. The protein  
34 synthesis machinery of the malaria parasite *Plasmodium falciparum* is a promising unexploited target for  
35 antimalarial development, but its study has been hindered by use of indirect experimental methods which often  
36 produce misleading and inaccurate results. We have recently developed a direct method to investigate malaria  
37 protein synthesis utilizing whole-parasite extracts. In this work, we present an extensive characterization of  
38 the assay, using a panel of pharmacologic inhibitors with known mechanisms of action. We demonstrate the  
39 specificity of the assay in various stages of protein synthesis, as well as its improved accuracy and sensitivity  
40 in comparison to an indirect measure that has been the previous standard for the field. We further demonstrate  
41 that no current clinically available antimalarial drugs inhibit protein synthesis, emphasizing its potential as a  
42 target for drugs that will overcome existing resistance. Importantly, among the antimalarials tested was  
43 mefloquine, a widely used antimalarial that has recently been mischaracterized as an inhibitor protein  
44 synthesis. Our finding that mefloquine does not inhibit protein synthesis emphasizes the importance of using  
45 direct functional measurements when determining drug targets.

46

## 47 **Introduction**

48           Despite ongoing efforts in its treatment and prevention, malaria remains a severe global health burden,  
49 with nearly half the world's population at risk, and incidence of the disease actually increasing in the most  
50 recent years for which data are available [1]. Though malaria-related mortality has continued to decrease, the  
51 rise in incidence is particularly concerning in light of reduced investment worldwide in combatting malaria,  
52 combined with climate change and geopolitical instability that may contribute to a resurgence of the disease  
53 [1]. One compounding factor in the battle to eliminate malaria is the persistent emergence of drug resistance  
54 in the malaria parasite *Plasmodium falciparum* [1]. As combination therapies are the main defense against  
55 resistance, an important focus in therapeutic development is the identification of compounds with unique  
56 targets and novel mechanisms of action that are unlikely to be precluded by existing resistance mutations.  
57 Medicines for Malaria Venture (MMV) has recently demonstrated the potential of efforts directed at novel  
58 targets; two drugs currently showing great promise in clinical trials, SJ733 and cipargamin, inhibit the *P.*  
59 *falciparum* cation ATPase PfATP4, constituting a new class of drug [2,3].

60           One promising avenue for development of a novel target class is the inhibition of the *P. falciparum*  
61 ribosome, as well as other components of the translational machinery responsible for protein synthesis.  
62 Translation inhibitors have exhibited great clinical success as potent antibiotics, and in fact, several, including  
63 doxycycline and azithromycin, have found additional application as antimalarials, as they target ribosomes  
64 within the malaria parasite's mitochondria and apicoplast, leading to loss of function of these organelles [4–6].  
65 Interestingly, the *P. falciparum* cytoplasmic ribosome appears to occupy an evolutionary middle ground  
66 between prokaryotic and eukaryotic, differentiating it sufficiently from human ribosomes to yield a useful  
67 therapeutic window [5]. Indeed, a potent and highly selective inhibitor of the *P. falciparum* ribosome, M5717  
68 (previously DDD107498), is currently in first-in-human study, validating the potential of the *P. falciparum*  
69 translational apparatus as an effective target for antimalarial drugs of this class [7].

70 To facilitate the identification of translation inhibitors, we previously developed a *P. falciparum*  
71 whole-cell extract-based *in vitro* translation assay (PfIVT), and successfully applied the technique to detect  
72 small molecule inhibitors in the MMV Malaria Box [8]. More recently, it has been suggested that the widely  
73 used drug mefloquine may inhibit the 80S ribosome of *P. falciparum* [9]. In addition, many currently  
74 approved antimalarial compounds lack a definitive mechanism of action, raising the possibility that some of  
75 these clinical therapies act through inhibition of translation. Here, we aimed to clarify which compounds truly  
76 exhibit inhibitory activity against the *Plasmodium falciparum* 80S ribosome and the associated translational  
77 apparatus. To do so, we compared a panel of antimalarial drugs (both clinical and pre-clinical) with well-  
78 characterized inhibitors of translation and other defined control compounds in the PfIVT assay, as well as in  
79 the S35-radioabel incorporation assay, a historically utilized indirect measure of translation. Importantly, we  
80 found that none of the current clinical therapeutics inhibit translation, including mefloquine. Regardless,  
81 testing of tool compounds shows that the PfIVT assay is capable of identifying not only translation inhibitors  
82 that directly interact with the ribosome, but also inhibitors of other non-ribosomal components of the  
83 translational machinery, demonstrating the broad utility of the assay for identifying novel malaria therapeutics  
84 that target *P. falciparum* translation.

85

## 86 **Results**

87

### 88 **Extract optimization and quality control for the *Plasmodium falciparum in vitro* translation assay**

89 To ensure reproducible consistency and robustness of the *P. falciparum in vitro* translation (PfIVT)  
90 assay, we performed extensive validation of parasite extracts. A detailed, step-by-step protocol is presented in  
91 the supplement. Only those extracts surpassing a rigorous activity threshold were utilized for the PfIVT assay,  
92 and extracts from individual harvests meeting this criterion were combined to generate large pools for use

93 across many assays. Ribosome activity is especially sensitive to divalent cations, in particular magnesium  
94 concentration [10]. Therefore, we measured the magnesium concentrations of each PfIVT extract, and then  
95 determined the optimal amount of magnesium required by each extract in order to achieve maximal activity.  
96 Post-harvest magnesium concentrations were typically less than 2mM, whereas the maximum translational  
97 activity corresponded to a final PfIVT reaction concentration of approximately 4mM magnesium (Figs 1A and  
98 1B). Upon determining optimal magnesium conditions for each pool of extract, kinetic curves were generated  
99 with 15-minute increments to establish the ideal incubation time for the assay (Fig 1C). This was necessary,  
100 since assay kinetics varied between extracts. Note that separate kinetic curves must also be established for the  
101 particular reporter utilized (in this case, firefly luciferase). To maintain maximal sensitivity to inhibitors and  
102 linearity of the assay, we conducted PfIVT experiments at the time point corresponding to 75-80% of the  
103 saturation signal (Fig 1C).

104

### 105 **Probing different stages of translation in a *Plasmodium falciparum* cellular extract system using tool** 106 **compounds**

107 The process of translation may be binned into three main stages: initiation, elongation, and termination  
108 [11,12]. In eukaryotes, this process is carried out by the 80S ribosome, comprised of a small (40S) and large  
109 (60S) subunit [11,12]. To further validate the PfIVT assay and investigate its capacity to interrogate the  
110 entirety of the normal activity of the 80S ribosome (and thus identify drugs inhibiting all steps of the process  
111 of translation), an extensive panel of previously characterized translational inhibitors was tested, both in the  
112 PfIVT assay, as well as in the historically utilized S35-radiolabelled amino acid incorporation assay. In  
113 contrast to the PfIVT assay, which directly measures activity of the 80S ribosome and the associated  
114 translational apparatus, S35 incorporation is an indirect measure of translation. Despite this, and the S35  
115 incorporation assay's resulting sensitivity to changes to upstream and parallel pathways, which often

116 generating ambiguous or misleading results, it has remained a commonly used assay for studying parasite  
117 translation for lack of a better alternative [9].

118 Commercially available compounds that directly interact with the eukaryotic ribosome to inhibit  
119 translation initiation and/or elongation via a variety of mechanisms and binding sites, as well as several  
120 inhibitors of translation known to act upon non-ribosomal components of the translational machinery were  
121 tested (Tables 1 & 2). The eukaryote-specific inhibitors bruceantin and verrucarins A inhibit translation  
122 initiation through binding of mutually exclusive sites [12–15]. Suramin, also a specific inhibitor of the  
123 eukaryotic ribosome, inhibits both initiation and elongation through binding of multiple sites on the 40S, 60S  
124 and 80S ribosomes [16]. The eukaryote-specific elongation inhibitors tested are also distinct in their activities:  
125 cycloheximide and lactimidomycin overlap in their binding of the ribosome A-site, but differences in size and  
126 side-chains yield unique effects; anisomycin also overlaps cycloheximide's binding site, but the two drugs  
127 bind the ribosome in distinct rotational conformations at different steps of elongation; homoharringtonine  
128 binds the A-site, but specifically inhibits re-initiating ribosomes; and nagilactone C inhibits both eEF-1 $\alpha$ -  
129 dependent aminoacyl-tRNA loading and peptidyl transferase activity [12,13,17–19]. Halofuginone, also a  
130 specific inhibitor of eukaryote translation, does not interact with the ribosome, but instead inhibits glutamyl-  
131 prolyl-tRNA synthetase [20]. Puromycin was the sole pan-inhibitor tested, and acts as a tRNA mimetic that is  
132 incorporated into the nascent polypeptide chain, leading to its premature termination [21,22]. Negative  
133 controls were thiostrepton, a specific inhibitor of prokaryotic translation initiation and elongation; actinomycin  
134 D, an inhibitor of RNA polymerase II; tubercidin, an adenosine mimetic; and thapsigargin, a  
135 sarco/endoplasmic reticulum ATPase (SERCA) inhibitor [23–32].

136 **Table 1. Mechanism of action and species specificity of translation inhibitors.**

| COMPOUND   | SPECIFICITY                                   | MECHANISM OF ACTION | REFERENCE |
|------------|-----------------------------------------------|---------------------|-----------|
| bruceantin | eukaryotic ( <i>Pf</i> cytoplasmic ribosomes) | inhibits initiation | [15]      |

|                   |                                                               |                                                              |         |
|-------------------|---------------------------------------------------------------|--------------------------------------------------------------|---------|
| verrucarin A      | eukaryotic ( <i>Pf</i> cytoplasmic ribosomes)                 | inhibits initiation, binds between P- & A-sites              | [12–14] |
| suramin           | eukaryotic ( <i>Pf</i> cytoplasmic ribosomes)                 | inhibits initiation & elongation, multiple binding sites     | [16]    |
| anisomycin        | eukaryotic ( <i>Pf</i> cytoplasmic ribosomes)                 | inhibits elongation, binds A-site                            | [12,17] |
| cycloheximide     | eukaryotic ( <i>Pf</i> cytoplasmic ribosomes)                 | inhibits elongation, binds E-site                            | [12]    |
| homoharringtonine | eukaryotic ( <i>Pf</i> cytoplasmic ribosomes)                 | inhibits elongation on re-initiating ribosomes, binds A-site | [12,18] |
| lactimidomycin    | eukaryotic ( <i>Pf</i> cytoplasmic ribosomes)                 | inhibits elongation, binds E-site                            | [12]    |
| nagilactone C     | eukaryotic ( <i>Pf</i> cytoplasmic ribosomes)                 | inhibits elongation, binds A-site                            | [12,19] |
| puromycin         | pan-inhibitor                                                 | tRNA mimetic                                                 | [21,22] |
| halofuginone      | eukaryotic                                                    | inhibits glutamyl-prolyl-tRNA synthetase                     | [20]    |
| thiostrepton      | prokaryotic ( <i>Pf</i> mitochondrial & apicoplast ribosomes) | inhibits initiation & elongation                             | [23–29] |

137

138 **Table 2. Mechanism of action of non-translation inhibitors.**

| COMPOUND      | MECHANISM OF ACTION         | REFERENCE |
|---------------|-----------------------------|-----------|
| actinomycin D | RNA polymerase II inhibitor | [30]      |
| tubercidin    | adenosine mimetic           | [31]      |
| thapsigargin  | SERCA inhibitor             | [32–34]   |

139

140 After determining the EC<sub>50</sub> of each drug for the *P. falciparum* W2 strain in a 72-hour parasite growth  
141 assay, the drugs were characterized in both the S35 incorporation and PfIVT assays (Table 3)(Figs 2 and 3).  
142 Drugs were tested in the S35 and PfIVT assays at 0.1-, 1-, 10-, and 100-fold their determined growth assay  
143 EC<sub>50</sub> in W2 parasites, except in cases where the highest concentration was constrained by solubility or  
144 available stock solution. The translation initiation inhibitors bruceantin and verrucarin A were both potent

145 (nanomolar) inhibitors of S35 incorporation and PfIVT (Fig 2). All translation elongation inhibitors  
146 (anisomycin, cycloheximide, homoharringtonine, lactimidomycin, and nagilactone C) also strongly inhibited  
147 both S35 incorporation and PfIVT (Fig 2). Cycloheximide was additionally tested at 1000-fold its EC<sub>50</sub>, as it  
148 did not inhibit S35 incorporation at the lower concentrations tested, but did at this higher concentration, in line  
149 with inhibitory concentrations in recent reports, which also show that significantly higher concentrations of  
150 cycloheximide are required for complete, measurable inhibition of translation than for rapid and total parasite  
151 killing *in vivo* (S1 Fig) [8,9,35]. Suramin, which has been shown to inhibit both translation initiation and  
152 elongation, robustly inhibited PfIVT, but not S35 incorporation, likely due to poor cell permeability and the  
153 short timeframe of the S35 assay (2 hour drug pre-incubation followed by 2 hour radiolabel incorporation)  
154 (Fig 2). The tRNA mimetic puromycin, which induces premature termination of nascent polypeptides,  
155 inhibited both S35 incorporation and PfIVT with similar efficacy (Fig 2). Elucidating an even greater range of  
156 utility for the PfIVT assay, we found it to be capable of identifying inhibitors of non-ribosomal components of  
157 translation. The glutamyl-prolyl-tRNA synthetase inhibitor halofuginone inhibits both S35 incorporation and  
158 the PfIVT assay (Fig 2). In sum, these data demonstrate the ability of the PfIVT assay to interrogate both  
159 direct ribosomal activity, as well as extra-ribosomal components of the translational machinery.

160 **Table 3. Half-maximal effective concentrations (nM) determined in *P. falciparum* growth inhibition**  
161 **assay**

| TEST COMPOUNDS | 72H GROWTH INHIBITION<br>EC <sub>50</sub> (nM) | ANTIMALARIALS     | 72H GROWTH INHIBITION<br>EC <sub>50</sub> (nM) |
|----------------|------------------------------------------------|-------------------|------------------------------------------------|
| bruceantin     | 4.2                                            | MMV008270         | 2400                                           |
| verrucarin A   | 0.6                                            | SJ733             | 60                                             |
| suramin        | 1819                                           | M5717 (DDD107498) | 1                                              |
| anisomycin     | 39                                             | quinine           | 370                                            |
| cycloheximide  | 0.6                                            | chloroquine       | 333                                            |



|                   |      |                                       |      |
|-------------------|------|---------------------------------------|------|
| homoharringtonine | 6.8  | mefloquine                            | 25   |
| lactimidomycin    | 22   | piperazine                            | 26   |
| nagilactone C     | 1310 | primaquine                            | 1849 |
| puromycin         | 52   | monodesethyl amodiaquine <sup>a</sup> | 61   |
| halofuginone      | 2    | lumefantrine                          | 4    |
| thiostrepton      | 942  | dihydroartemisinin                    | 3    |
| actinomycin D     | 10   |                                       |      |
| tubercidin        | 168  |                                       |      |
| thapsigargin      | 2900 |                                       |      |

<sup>a</sup> Active metabolite of amodiaquine

### **The *Plasmodium falciparum* *in vitro* translation assay measures activity of cytoplasmic ribosomes**

Importantly, all of the eukaryotic ribosome-specific inhibitors, which therefore should inhibit only *P. falciparum* cytoplasmic and not apicoplast or mitochondrial ribosomes, displayed inhibition in the PfIVT assay, with several achieving complete or near complete blocking of translation (suramin, anisomycin, lactimidomycin, nagilactone C) (Fig 2). In addition, the prokaryotic ribosome-specific inhibitor thiostrepton did not inhibit the PfIVT assay at any concentration tested, despite inhibiting the S35 assay at concentrations above its determined EC50 (Fig 3). Thiostrepton is known to have multiple targets apart from ribosomes in eukaryotes and has been shown to induce an ER stress response with a phenotype similar to thapsigargin, which likely accounts for its activity in the S35 assay [36–38].

### **The S35 incorporation assay is not a reliable indicator of direct translation inhibition**

Although it is well documented in other model systems (i.e. yeast) that the S35-radiolabeled amino acid incorporation assay is an indirect measure of translation and can, as such, generate many misleading

177 artifacts, this has not yet been characterized carefully with respect to *Plasmodium spp.* [33,34]. Despite this,  
178 several studies in *Plasmodium* have relied on this indirect measure as a primary readout of translation [9,39].  
179 To address this and further determine the specificity of the PfIVT assay relative to the S35 uptake assay, we  
180 tested a panel of small molecules that are known to inhibit cellular processes other than translation (Tables 2  
181 and 3). Not surprisingly, actinomycin D, an inhibitor of transcription targeting RNA Polymerase II, and the  
182 SERCA inhibitor thapsigargin both exhibited strong inhibition in the S35 incorporation assay, but had no  
183 effect in the PfIVT assay (Fig 3). Tubercidin, an adenosine mimetic, had a modest inhibitory effect on S35  
184 incorporation, but, again, negligible effect in the PfIVT assay (Fig 3). These data confirm that the PfIVT assay  
185 directly measures translation, and highlight the lack of translation specificity of the S35 incorporation assay.

186

### 187 **Analysis of clinically-approved antimalarials reveals that none, including mefloquine, inhibit the 80S** 188 **ribosome**

189 We next sought to test a panel of clinically approved antimalarial drugs with undefined or disputed  
190 mechanisms of action, to determine whether any might act through direct inhibition of translation, subjecting  
191 these drugs to the same battery of assays described above (*P. falciparum* growth, PfIVT, and S-35  
192 incorporation) (Tables 3 and 4). Chloroquine and piperaquine were mild inhibitors of the S35 incorporation  
193 assay at the highest drug concentrations tested (Fig 4). Quinine, lumefantrine, primaquine, monodesethyl  
194 amodiaquine (the active metabolite of amodiaquine), and dihydroartemisinin were moderate-to-strong  
195 inhibitors of the S35 incorporation assay (Fig 4). SJ733, an inhibitor of the sodium transporter PfATP4, and a  
196 clinical candidate currently in Phase I trials, exhibited strong inhibition in the S35 incorporation assay (Fig 4).  
197 Notably, none of these antimalarial drugs inhibited the PfIVT assay. However, primaquine cannot be ruled  
198 out with complete certainty as an inhibitor of translation, as its active metabolite may not be produced in an *in*  
199 *vitro* setting, and it does show moderate activity in the S35 incorporation assay [40].

200 We also included several drugs (clinical and pre-clinical) that have recently been reported to inhibit  
201 translation (Tables 3 and 4)[7–9]. MMV008270 was a moderate inhibitor of the S35 incorporation assay,  
202 while mefloquine and DDD107498 robustly inhibited S35 incorporation (Fig 4). Strikingly, while  
203 DDD107498 and MMV008270 inhibited the PfIVT assay, mefloquine failed to do so (Fig 4). Interestingly,  
204 MMV008270 was an exceptionally effective inhibitor of translation in the PfIVT assay at all concentrations  
205 tested, significantly outperforming the S35 incorporation assay (Fig 4). These data reveal that mefloquine has  
206 recently been mischaracterized as a ribosome inhibitor through use of the S35 incorporation assay, when it  
207 does not, in fact, directly inhibit translation [9].

208 To further validate the PfIVT data regarding mefloquine, we repeated the PfIVT assay, alongside a  
209 commercially available rabbit reticulocyte *in vitro* translation assay (RRIVT), with a full titration of drug to  
210 determine half maximal effective values for both mefloquine and DDD107498 (Fig 5). As expected, the  
211 positive control cycloheximide was a robust inhibitor of both translation systems (PfIVT IC<sub>50</sub>: 31.91nM ,  
212 RRIVT IC<sub>50</sub>: 37.8nM ), while DDD107498 was a potent inhibitor of *P. falciparum*, but not rabbit reticulocyte  
213 translation, confirming the reported high *P. falciparum* selectivity of DDD107498 (PfIVT IC<sub>50</sub>: 60.5nM)(Fig  
214 5). In contrast, mefloquine failed to inhibit in either the PfIVT or RRIVT assay, even at concentrations as  
215 high as 20uM (Fig 5). The reported binding site of mefloquine to the 80S ribosome is on the highly conserved  
216 ribosomal protein uL13; if this were indeed the active binding site of the drug, mefloquine should inhibit the  
217 RRIVT assay [41]. To rule out the possibility that mefloquine solubility may be a confounding factor in the  
218 IVT assays, completed PfIVT reactions with a dilution series of mefloquine or DMSO control were  
219 centrifuged at high speed, sterile-filtered, and the resulting supernatant was used as the input for an *in vivo*  
220 growth assay. EC<sub>50</sub> values were comparable between the IVT reaction supernatant containing mefloquine  
221 (12.31nM) and mefloquine alone (4.17nM), thus demonstrating that mefloquine is soluble in the PfIVT assay

(S2 Fig). These data make clear that mefloquine does not act through inhibition of the *P. falciparum* ribosome, nor through other direct inhibition of the translational machinery.

## Discussion

This work presents an extensive dissection and validation of the whole-cell extract-derived PfIVT assay, the only reported direct measure of *P. falciparum* translation to date. Through probing the assay with numerous small molecule inhibitors of translation, exhibiting a diversity of binding sites and mechanisms of action, as well as a variety of well-characterized tool compounds inhibiting non-translational pathways, we demonstrate that the PfIVT assay specifically measures *P. falciparum* cytoplasmic ribosome activity. *In vitro* translation extracts are inherently difficult to make, and even more so for an intraerythrocytic parasite. However, when subjected to stringent quality control and careful optimization, the PfIVT assay reliably and specifically identifies inhibitors of translation initiation and elongation, as well as inhibitors of non-ribosomal proteins necessary for translation, such as tRNA synthetase.

The PfIVT assay is particularly valuable to the study of *P. falciparum* translation as a direct measure of translation, as opposed to the indirect measures to which the field has historically been constrained, such as incorporation of radiolabeled amino acids *in vivo*. Importantly, our data show the PfIVT assay is significantly more specific, and in some cases more sensitive, than S35-radiolabel incorporation in identifying small molecule inhibitors of translation. Indeed, the PfIVT assay specifically identified all eukaryotic translation inhibitors tested, while S35-radiolabel incorporation was prone to false-positives. We found that none of the clinically approved antimalarials tested are inhibitors of translation, emphasizing the potential for translation as a useful therapeutic target, as there is unlikely to be pre-existing mechanism-specific resistance to any identified candidates resulting from use of these drugs. It is notable that mefloquine, in contrast to other previously reported translation inhibitors, did not exhibit any inhibitory activity. Mefloquine was likely

245 mischaracterized as an 80S ribosome inhibitor through a combination of non-specific inhibition of S35  
246 incorporation, as well as artifacts arising from cryo-EM structures obtained under the non-physiologic  
247 condition of 10mM magnesium – well above the ~4mM magnesium that we have found to be optimal for  
248 translation (Fig 1)[9].

249 While the PfIVT assay exhibits clear benefits over existing methodologies for the study of *P.*  
250 *falciparum* translation, we acknowledge that the technique has several limitations. As is the case with *in vitro*  
251 translation systems in other organisms, the current assay is likely biased toward the study of non-cap-  
252 dependent initiation and elongation. We utilized uncapped mRNA in this study to focus specifically on  
253 activity of the 80S ribosome itself, rather than the cap-recognition apparatus. It is possible that utilization of  
254 capped mRNA in future studies would facilitate interrogation of cap-dependent translation initiation.  
255 Likewise, there are few characterized pharmacologic inhibitors of eukaryotic translation termination, none of  
256 which are currently commercially available; thus, the PfIVT system, as described, may not be sensitive to all  
257 specific inhibitors of translation termination. Additionally, some translation inhibitors, such as  
258 homoharringtonine, demonstrated greater potency in the S35 incorporation and growth inhibition assays than  
259 in PfIVT. Such variation between the two assays may suggest off-target effects of these drugs, or differences  
260 between whole living cells and cellular extracts.

261 Determining the true molecular targets of antimalarials is critical to improved therapeutic  
262 development. Exploiting differences between *P. falciparum* and mammalian ribosomes remains a promising  
263 avenue, as evidenced by the potent and discriminating drug DDD107498. Here, we have shown that  
264 orthogonal biochemical assays may be used to test hypotheses generated by structural data and cell-based  
265 assessments. Our investigation of mefloquine reaffirms that direct functional measurements of drug activity  
266 are critical to identifying the genuine molecular targets of drugs. Importantly, we show that the PfIVT assay is  
267 a uniquely direct measure of *P. falciparum* translation that can be used to facilitate a better understanding of

268 the specifics of *P. falciparum* protein synthesis, with potentially great consequences for antimalarial  
269 therapeutic development.

270

## 271 **Methods**

272

### 273 **Drug stocks**

274 *In vivo* growth and *in vitro* translation measurements were performed using the same drug dilutions.

275 The antimalarial drugs chloroquine, dihydroartemisinin, lumefantrine, monodesethyl amodiaquine,  
276 piperazine, primaquine, and quinine were a generous gift from Dr. Phil Rosenthal of UCSF. SJ733 was  
277 generously provided by Dr. Kip Guy of St. Jude Children's Research Hospital. All other compounds were  
278 purchased from the indicated vendors: DDD107498 (Apexbio #A8711-5), mefloquine hydrochloride (Sigma-  
279 Aldrich #M2319), emetine (Sigma-Aldrich #E2375), cycloheximide (Fisher #AC35742-0010), MMV008270  
280 (Vitas-M Laboratory #STK591252), actinomycin D (Sigma-Aldrich #A1410), tubercidin (Sigma-Aldrich  
281 #T0642), thapsigargin (Sigma-Aldrich #SML1845), ionomycin (Sigma-Aldrich #407951), thiostrepton  
282 (Sigma-Aldrich #598226), bruceantin (Toronto Research Chemicals #B689310), verrucaric acid (Sigma-Aldrich  
283 #V4877), anisomycin (Sigma-Aldrich #A5862), homoharringtonine (Sigma-Aldrich #SML1091),  
284 lactimidomycin (EMD Millipore #506291), nagilactone C (BOC Sciences #24338-53-2), suramin sodium salt  
285 (Sigma-Aldrich #S2671), puromycin (Thermo Fisher #A1113803), halofuginone (Sigma-Aldrich #32481).

286

### 287 ***Plasmodium falciparum* strain and culturing**

288 *Plasmodium falciparum* W2 (MRA-157) was obtained from MR4. Parasites were grown in human  
289 erythrocytes (2% hematocrit) in RPMIc (RPMI 1640 media supplemented with 0.25% Albumax II (GIBCO  
290 Life Technologies), 2 g/L sodium bicarbonate, 0.1 mM hypoxanthine, 25 mM HEPES (pH 7.4), and 50 µg/L

291 gentamicin), at 37 °C, 5% O<sub>2</sub>, and 5% CO<sub>2</sub>. Cells were synchronized with 5% sorbitol treatment for two  
292 generations to achieve high synchronicity.

### 294 **Growth inhibition assays**

295 2μL of serial drug dilutions in 100% DMSO were dispensed in triplicate to 96-well plates utilizing the  
296 LabCyte ECHO acoustic liquid handler. 198μL of *P. falciparum* W2 cultures were added. Growth was  
297 initiated with ring-stage parasites at 0.8% parasitemia and 0.5% hematocrit. Plates were incubated at 37 °C,  
298 5% O<sub>2</sub>, and 5% CO<sub>2</sub> for 72 hours. Growth was terminated by fixation with 1% formaldehyde, and parasitized  
299 cells were stained with 50nM YOYO-1 (Invitrogen). Parasitemia was determined by flow cytometry on the  
300 BD LSRII, analyzed using FlowJo software version 10, and EC50 were curves plotted by GraphPad Prism.  
301 Two biological replicates were performed for each drug.

### 303 **Generation and quality control of extracts for *Plasmodium falciparum* in vitro translation assay**

304 For PfIVT harvests, one liter of synchronized parasite culture in 2-4% hematocrit was grown in two  
305 500mL HYPERFlask M vessels (Corning), and media was changed every 8-12 hours, with the final media  
306 change at 4-8 hours prior to harvest. Parasites were harvested in the late trophozoite stage at 15-20%  
307 parasitemia by centrifugation for 5 min at 1500×g at room temperature, followed by removal of media and  
308 addition of ice-cold 0.025-0.05% final saponin in Buffer A (20 mM HEPES pH 8.0, 2 mM Mg(OAc)<sub>2</sub>,  
309 120 mM KOAc). Due to variations between and within lots, saponin stocks were prepared in large volumes,  
310 aliquoted, and stored at -20°C. Percentage utilized for each batch of aliquots was determined empirically  
311 through pairwise testing of concentrations (1 for each HYPERFlask) and assessed via resulting activity of  
312 PfIVT extracts. Saponin-lysed pellets were centrifuged at 4°C and 10,000×g for 10 minutes and washed twice  
313 with ice-cold Buffer A. Supernatant was carefully removed, and washed pellets were resuspended in an equal

314 volume of Buffer B2 (20 mM HEPES pH8.0, 100 mM KOAc, 0.75 mM Mg(OAc)<sub>2</sub>, 2 mM DTT, 20 %  
315 glycerol, 1X EDTA-free protease inhibitor cocktail (Roche)), flash frozen, and stored in -80°C freezer until  
316 the sample was ready to homogenize.

317 Frozen pellets were thawed on ice and added to a 3-mL Luer lock syringe, which was then secured  
318 onto a pre-chilled cell homogenizer containing a 4µm-clearance ball bearing (Isobiotec, Germany) that was  
319 pre-washed with ice-cold Buffer B2. Homogenate was passed between two syringes 20 times on ice, either by  
320 hand or by use of a custom robot built to accommodate the cell homogenizer (42). Lysate was immediately  
321 centrifuged at 4°C and 16,000×g for 10 minutes, and the supernatant (the resulting PfIVT extract) was  
322 transferred to a fresh tube, with a small (100µL) aliquot set aside for activity testing. Extracts and test aliquots  
323 were flash-frozen and stored at -80°C. Test aliquots from multiple harvests were thawed on ice and tested in  
324 batches in the PfIVT assay (see below) across a small range of magnesium concentrations with a 2 hour  
325 incubation time, using a firefly luciferase reporter. Extracts that surpass the activity threshold of 10<sup>4</sup> relative  
326 luciferase units (RLU) were then thawed on ice and combined to generate large volume pools. Extract pools  
327 were flash-frozen in 200µL aliquots and stored at -80°C. Extract pools were tested across a range of  
328 magnesium concentrations via PfIVT assay to determine the optimum magnesium concentration. Once  
329 magnesium concentration has been determined, pools are then tested in the PfIVT assay in 15 minute  
330 incubation time points up to 150 minutes to determine the kinetics of the extract pool, and thus the appropriate  
331 incubation time for the pool (~75-80% of maximum signal, within the linear range of the extract's kinetic  
332 curve). Kinetics must be separately assessed for each reporter used (i.e. if a nanoluciferase reporter is used  
333 instead of firefly luciferase).

334 **Magnesium concentration assays**



335 Baseline magnesium levels of the PfIVT extracts were measured using a magnesium-dependent  
336 enzyme-based colorimetric assay kit (Sigma-Aldrich #MAK026). Two biological replicates of a dilution  
337 series of each extract were tested in duplicate with each of two separate kits, following the protocol provided  
338 with the kit. In brief, 10 $\mu$ L of each PfIVT extract (neat, or diluted 1:4 or 1:10 with ddH<sub>2</sub>O) added to 10 $\mu$ L  
339 ddH<sub>2</sub>O, along with a standard curve, was combined with 50 $\mu$ L of master reaction mix (35 $\mu$ L magnesium  
340 assay buffer, 10 $\mu$ L developer, 5 $\mu$ L magnesium enzyme mix), and incubated for 10 minutes with shaking at  
341 37°C. 450nm absorbance was read immediately after the initial incubation, and every 5 minutes thereafter on  
342 a Tecan plate reader until the highest A<sub>450</sub> approached (but did not exceed) 1.5X the initial reading. Values  
343 were fitted to, and interpolated from, the standard curve using Prism GraphPad.

#### 345 ***Plasmodium falciparum in vitro* translation assay**

346 *P. falciparum in vitro* translation (PfIVT) reactions were carried out in skirted v-bottom 96-well PCR  
347 plates (BioRad) and sealed with adhesive aluminum foil plate seals (Beckman Coulter, Indianapolis, IN,  
348 USA). 200nL of drug in 100% DMSO was dispensed in duplicate to appropriate wells of the plate utilizing a  
349 Labcyte ECHO acoustic liquid handler. 19.8 $\mu$ L of PfIVT reaction mix (per 20 $\mu$ L: 14 $\mu$ L extract, 1  $\mu$ g T7-  
350 transcribed firefly luciferase mRNA, 10  $\mu$ M amino acid mixture, 20 mM HEPES/KOH pH 8.0, 75 mM KOAc,  
351 2 mM DTT, 0.5 mM ATP, 0.1 mM GTP, 20 mM creatine phosphate, 0.2  $\mu$ g/ $\mu$ l creatine kinase, and the  
352 appropriate amount of Mg(OAc)<sub>2</sub> as determined for the particular pool of extract) was then dispensed to each  
353 well using Rainin E4 12-channel electronic pipettes (Rainin Instruments, Oakland, CA, USA). Reactions were  
354 incubated at 37°C for the appropriate amount of time as determined for the particular pool of extract. After  
355 incubation, the reactions were placed on ice, then quenched through transfer to a 96-well LUMITRAC 200  
356 flat-bottom white assay plate (Greiner Bio-One, Monroe, NC, USA) containing 2 $\mu$ L of 50 $\mu$ M cycloheximide  
357 (dispensed using the Labcyte ECHO), then immediately centrifuged to combine the PfIVT reaction with the

358 cycloheximide for a final concentration of 5  $\mu$ M cycloheximide. Reactions were assayed using the Promega  
359 GloMax-Multi + microplate reader with a three-second delay and three-second integration after addition of  
360 200 $\mu$ L luciferin reagent dispensed at a speed of 200 $\mu$ L/second (firefly luciferin reagent: 20 mM Tricine,  
361 2.67 mM MgSO<sub>4</sub>×7H<sub>2</sub>O, 0.1 mM EDTA, 33.3 mM DTT, 530  $\mu$ M ATP, 270  $\mu$ M Acetyl CoEnzyme A, 1 mM  
362 D-Luciferin, 265  $\mu$ M Magnesium Carbonate Hydroxide, pH 8.15). Three biological replicates were performed  
363 in duplicate for each drug. IC<sub>50</sub> curves were plotted by GraphPad Prism.

364

### 365 **Rabbit reticulocyte *in vitro* translation assay**

366 Rabbit reticulocyte *in vitro* translation assays were performed as described in Ahyong *et al* with the  
367 exception that the final [DMSO] for MMV008270 was 2.5% and all other final [DMSO] = 0.55% [8]. IC<sub>50</sub>  
368 curves were plotted by GraphPad Prism.

369

### 370 **S35 incorporation assay**

371

372 **Parasite purification.** Synchronized parasites were cultured in 2% hematocrit at 10-15% parasitemia, and  
373 MACS purified at the late trophozoite stage to remove uninfected erythrocytes using standard protocols. In  
374 brief, at least two LD MACS Separation columns (Miltenyi Biotech) per 50mL of culture were washed with  
375 1.25mL of pre-warmed RPMIc. Next, cultures were added to the columns 5mL at a time and allowed to  
376 gravity filter at 37°C. Finally, the columns were rinsed with 2.5mL of pre-warmed RPMIc, removed from the  
377 magnetic stand, and eluted with 2mL of pre-warmed RPMIc.

378

379 **Drug treatment and S35 labeling.** 1 $\mu$ L of drug in 100% DMSO was dispensed to each well of a 96-well  
380 round-bottom culture plate utilizing the Labcyte ECHO acoustic liquid handler. 2x10<sup>7</sup> MACS-purified

381 parasites in 199 $\mu$ L of RPMIc were then added to each well. Parasites were incubated with drug for 2 hours at  
382 37°C, 5% CO<sub>2</sub>, 5% O<sub>2</sub>. Next, samples were transferred from 96-well plates to 1.5mL screw-cap microfuge  
383 tubes. 35 $\mu$ Ci of EasyTag™ Express S35 Protein Labeling Mix (Perkin Elmer) diluted to 10 $\mu$ L with RPMIc  
384 was added to each tube. Reactions were incubated at 37°C with mild shaking for 2 hours.

385

386 **Washing and lysis.** After incubation, cells were pelleted and 160 $\mu$ L of supernatant was removed. Parasites  
387 were then washed with 200 $\mu$ L of ice-cold PBS containing 50 $\mu$ M cycloheximide four times. After the final  
388 wash, all supernatant was removed and samples were resuspended in 15 $\mu$ L of 2X SDS buffer (100mM Tris-Cl  
389 pH 6.8, 4% SDS, 20% glycerol, 0.1M DTT). Samples were boiled at 98°C for 5 minutes and stored at -20°C.

390

391 **Scintillation counting.** Samples were thawed at room temperature, boiled for 5 minutes at 98°C, and spun at  
392 max speed in a tabletop microcentrifuge for 10 minutes. 10 $\mu$ L of supernatant per sample was placed on a  
393 0.45 $\mu$ m nitrocellulose membrane (HAWP02400 from Millipore). Each membrane was washed 4 times with  
394 15mL of TBS-T then placed in a 20mL HDPE scintillation vial (Fisher Scientific) with 8mL of Ecoscint A  
395 (National Diagnostics). S35 counts were measured for 1 minute using a Beckmann coulter, LS 6500 Multi-  
396 purpose Scintillation Counter. Three biological replicates were performed for each drug.

397

### 398 **Mefloquine solubility assay**

399 PfIVT extracts were incubated with a dilution series of mefloquine or DMSO control for 90 minutes. All  
400 PfIVT conditions were the same as above, except without addition of cycloheximide to stop translation.  
401 Reactions were centrifuged at 16,100xg for 10 minutes at room temperature; resulting supernatant was then  
402 filtered and added to cultures for the *P. falciparum* growth inhibition assays as described above.

403

## 404 ACKNOWLEDGEMENTS

405  
406 We thank Dr. Phil Rosenthal for providing stocks of several antimalarial drugs.  
407

## 408 REFERENCES

- 409
- 410 1. World malaria report 2017. Geneva: World Health Organization; 2017.
  - 411 2. White NJ, Pukrittayakamee S, Phyo AP, Rueangweerayut R, Nosten F, Jittamala P, et al. Spiroindolone  
412 KAE609 for Falciparum and Vivax Malaria. *N Engl J Med*. 2014 Jul 31;371(5):403–10.
  - 413 3. Jiménez-Díaz MB, Ebert D, Salinas Y, Pradhan A, Lehane AM, Myrand-Lapierre M-E, et al. (+)-SJ733,  
414 a clinical candidate for malaria that acts through ATP4 to induce rapid host-mediated clearance of  
415 Plasmodium. *Proc Natl Acad Sci U S A*. 2014 Dec 16;111(50):E5455–62.
  - 416 4. Rosenthal PJ. Azithromycin for Malaria? *Am J Trop Med Hyg*. 2016 Jul 6;95(1):2–4.
  - 417 5. Budimulja AS, Syafruddin, Tapchaisri P, Wilairat P, Marzuki S. The sensitivity of Plasmodium protein  
418 synthesis to prokaryotic ribosomal inhibitors. *Mol Biochem Parasitol*. 1997 Jan 1;84(1):137–41.
  - 419 6. Dahl EL, Shock JL, Shenai BR, Gut J, DeRisi JL, Rosenthal PJ. Tetracyclines Specifically Target the  
420 Apicoplast of the Malaria Parasite Plasmodium falciparum. *Antimicrob Agents Chemother*. 2006  
421 Sep;50(9):3124–31.
  - 422 7. Baragaña B, Hallyburton I, Lee MCS, Norcross NR, Grimaldi R, Otto TD, et al. A novel multiple-stage  
423 antimalarial agent that inhibits protein synthesis. *Nature*. 2015 Jun;522(7556):315–20.

- 424 8. Ahyong V, Sheridan CM, Leon KE, Witchley JN, Diep J, DeRisi JL. Identification of Plasmodium  
425 falciparum specific translation inhibitors from the MMV Malaria Box using a high throughput in vitro  
426 translation screen. *Malar J.* 2016 Mar 17;15.
- 427 9. Wong W, Bai X-C, Sleebs BE, Triglia T, Brown A, Thompson JK, et al. The antimalarial Mefloquine  
428 targets the Plasmodium falciparum 80S ribosome to inhibit protein synthesis. *Nat Microbiol.* 2017 Mar  
429 13;2:17031.
- 430 10. Bashan A, Yonath A. The linkage between ribosomal crystallography, metal ions, heteropolytungstates  
431 and functional flexibility. *J Mol Struct.* 2008 Nov 12;890(1–3):289–94.
- 432 11. Jackson RJ, Hellen CUT, Pestova TV. The mechanism of eukaryotic translation initiation and principles  
433 of its regulation. *Nat Rev Mol Cell Biol.* 2010 Feb;11(2):113–27.
- 434 12. Loubresse NG de, Prokhorova I, Holtkamp W, Rodnina MV, Yusupova G, Yusupov M. Structural basis  
435 for the inhibition of the eukaryotic ribosome. *Nature.* 2014 Sep;513(7519):517–22.
- 436 13. Cannon M, Jimenez A, Vazquez D. Competition between trichodermin and several other sesquiterpene  
437 antibiotics for binding to their receptor site(s) on eukaryotic ribosomes. *Biochem J.* 1976 Nov  
438 15;160(2):137–45.
- 439 14. Carrasco L, Fernandez-Puentes C, Vazquez D. Antibiotics and compounds affecting translation by  
440 eukaryotic ribosomes. Specific enhancement of aminoacyl-tRNA binding by methylxanthines. *Mol Cell  
441 Biochem.* 1976 Feb 1;10(2):97–122.
- 442 15. Liao LL, Kupchan SM, Horwitz SB. Mode of action of the antitumor compound bruceantin, an inhibitor  
443 of protein synthesis. *Mol Pharmacol.* 1976 Jan;12(1):167–76.

- 444 16. Brigotti M, Alfieri RR, Petronini PG, Carnicelli D. Inhibition by suramin of protein synthesis in vitro.  
445 Ribosomes as the target of the drug. *Biochimie*. 2006 May;88(5):497–503.
- 446 17. Lareau LF, Hite DH, Hogan GJ, Brown PO. Distinct stages of the translation elongation cycle revealed  
447 by sequencing ribosome-protected mRNA fragments. *eLife*. 2014 May 9;3.
- 448 18. Fresno M, Jiménez A, Vázquez D. Inhibition of translation in eukaryotic systems by harringtonine. *Eur J*  
449 *Biochem*. 1977 Jan;72(2):323–30.
- 450 19. CHAN J, KHAN SN, HARVEY I, MERRICK W, PELLETIER J. Eukaryotic protein synthesis inhibitors  
451 identified by comparison of cytotoxicity profiles. *RNA*. 2004 Mar;10(3):528–43.
- 452 20. Keller TL, Zocco D, Sundrud MS, Hendrick M, Edenius M, Yum J, et al. Halofuginone and other  
453 febrifugine derivatives inhibit prolyl-tRNA synthetase. *Nat Chem Biol*. 2012 Feb 12;8(3):311–7.
- 454 21. Azzam ME, Algranati ID. Mechanism of Puromycin Action: Fate of Ribosomes after Release of Nascent  
455 Protein Chains from Polysomes. *Proc Natl Acad Sci U S A*. 1973 Dec;70(12 Pt 1-2):3866–9.
- 456 22. Pestka S. Inhibitors of Ribosome Functions. *Annu Rev Microbiol*. 1971 Oct 1;25(1):487–562.
- 457 23. Brandi L, Marzi S, Fabbretti A, Fleischer C, Hill WE, Gualerzi CO, et al. The translation initiation  
458 functions of IF2: targets for thiostrepton inhibition. *J Mol Biol*. 2004 Jan 23;335(4):881–94.
- 459 24. Cameron DM, Thompson J, March PE, Dahlberg AE. Initiation factor IF2, thiostrepton and micrococcin  
460 prevent the binding of elongation factor G to the Escherichia coli ribosome. *J Mol Biol*. 2002 May  
461 24;319(1):27–35.
- 462 25. Pestka S. Thiostrepton: a ribosomal inhibitor of translocation. *Biochem Biophys Res Commun*. 1970  
463 Aug 11;40(3):667–74.

- 464 26. Rogers MJ, Cundliffe E, McCutchan TF. The Antibiotic Micrococcin Is a Potent Inhibitor of Growth and  
465 Protein Synthesis in the Malaria Parasite. *Antimicrob Agents Chemother.* 1998 Mar 1;42(3):715–6.
- 466 27. Uchiumi T, Wada A, Kominami R. A Base Substitution within the GTPase-associated Domain of  
467 Mammalian 28 S Ribosomal RNA Causes High Thiostrepton Accessibility. *J Biol Chem.* 1995 Dec  
468 15;270(50):29889–93.
- 469 28. Vazquez D. THE MECHANISMS OF SELECTIVITY AND ACTION OF PROTEIN SYNTHESIS  
470 INHIBITORS. In: Pratesi P, editor. *Medicinal Chemistry–III.* Butterworth-Heinemann; 1973. p. 355–70.
- 471 29. Walter JD, Hunter M, Cobb M, Traeger G, Spiegel PC. Thiostrepton inhibits stable 70S ribosome  
472 binding and ribosome-dependent GTPase activation of elongation factor G and elongation factor 4.  
473 *Nucleic Acids Res.* 2012 Jan 1;40(1):360–70.
- 474 30. Sobell HM. Actinomycin and DNA transcription. *Proc Natl Acad Sci U S A.* 1985 Aug;82(16):5328–31.
- 475 31. Acs G, Reich E, Mori M. BIOLOGICAL AND BIOCHEMICAL PROPERTIES OF THE ANALOGUE  
476 ANTIBIOTIC TUBERCIDIN. *Proc Natl Acad Sci U S A.* 1964 Aug;52:493–501.
- 477 32. Andersen TB, López CQ, Manczak T, Martinez K, Simonsen HT. Thapsigargin--from Thapsia L. to  
478 mipsagargin. *Mol Basel Switz.* 2015 Apr 8;20(4):6113–27.
- 479 33. Lytton J, Westlin M, Hanley MR. Thapsigargin inhibits the sarcoplasmic or endoplasmic reticulum Ca-  
480 ATPase family of calcium pumps. *J Biol Chem.* 1991 Sep 15;266(26):17067–71.
- 481 34. Wong WL, Brostrom MA, Kuznetsov G, Gmitter-Yellen D, Brostrom CO. Inhibition of protein synthesis  
482 and early protein processing by thapsigargin in cultured cells. *Biochem J.* 1993 Jan 1;289(Pt 1):71–9.

- 483 35. Plouffe D, Brinker A, McNamara C, Henson K, Kato N, Kuhen K, et al. In silico activity profiling  
484 reveals the mechanism of action of antimalarials discovered in a high-throughput screen. *Proc Natl Acad*  
485 *Sci U S A*. 2008 Jul 1;105(26):9059–64.
- 486 36. Kwok JM-M, Myatt SS, Marson CM, Coombes RC, Constantinidou D, Lam EW-F. Thiostrepton  
487 selectively targets breast cancer cells through inhibition of forkhead box M1 expression. *Mol Cancer*  
488 *Ther*. 2008 Jul;7(7):2022–32.
- 489 37. Sandu C, Ngounou Wetie AG, Darie CC, Steller H. Thiostrepton, a natural compound that triggers heat  
490 shock response and apoptosis in human cancer cells: a proteomics investigation. *Adv Exp Med Biol*.  
491 2014;806:443–51.
- 492 38. Lai C-Y, Yeh D-W, Lu C-H, Liu Y-L, Huang L-R, Kao C-Y, et al. Identification of Thiostrepton as a  
493 Novel Inhibitor for Psoriasis-like Inflammation Induced by TLR7-9. *J Immunol Baltim Md 1950*. 2015  
494 Oct 15;195(8):3912–21.
- 495 39. Hussain T, Yogavel M, Sharma A. Inhibition of Protein Synthesis and Malaria Parasite Development by  
496 Drug Targeting of Methionyl-tRNA Synthetases. *Antimicrob Agents Chemother*. 2015 Jan  
497 12;AAC.02220-13.
- 498 40. Pybus BS, Marcsisin SR, Jin X, Deye G, Sousa JC, Li Q, et al. The metabolism of primaquine to its  
499 active metabolite is dependent on CYP 2D6. *Malar J*. 2013 Jun 20;12:212.
- 500 41. Yusupova G, Yusupov M. Crystal structure of eukaryotic ribosome and its complexes with inhibitors.  
501 *Philos Trans R Soc Lond B Biol Sci*. 2017 Mar 19;372(1716).



502 42. Garcia VE, Liu J, DeRisi J. Low-Cost Touchscreen Driven Programmable Dual Syringe Pump for Life  
503 Science Applications. bioRxiv. 2018 Mar 25;288290.

## 504 505 **Supporting information**

506 **S1 Fig. Dose-dependent inhibition of S35 incorporation and PfIVT assays by cycloheximide.** Dose-  
507 dependent inhibition of S35 incorporation (blue bars) and PfIVT assays (red bars) by the translation inhibitor  
508 cycloheximide, tested up to 1000-fold (\*\*) the EC50 calculated in *P. falciparum* growth inhibition assay.

509  
510 **S2 Fig. Mefloquine solubility assay.** Dose-dependent inhibition of *P. falciparum* *in vivo* growth by  
511 mefloquine in PfIVT extract post-PfIVT reaction (Mefloquine IVT Extract), mefloquine alone (Mefloquine  
512 No Extract), or DMSO control in PfIVT extract post-PfIVT reaction (Extract + DMSO).

513  
514 **S3 Fig. Flowchart of saponin batch calibration for erythrocyte lysis.** Saponin amounts for RBC lysis are  
515 empirically determined through pairwise comparison for each preparation/batch of saponin. 3 to 5 harvests  
516 and pairwise tests will be required to determine the ideal amount of saponin for a given batch. Volumes  
517 indicated on the flowchart are for the volume of 0.15% saponin (in Buffer A) to be added to parasites in  
518 Buffer A and to a total volume of 50mL. Harvest 1 should be tested with 8mL and 10mL saponin. Subsequent  
519 pairs for testing are determined by following the arrows on the flowchart: if 8mL yields the more active  
520 extract in Harvest 1, Harvest 2 will compare 8mL with 6mL saponin; if 6mL yields the more active extract in  
521 Harvest 2, Harvest 3 will compare 6mL with 7mL saponin, and so on, until a final value has been reached.

522  
523 **S4 Fig. Flowchart for PfIVT extract quality control and pooling.** Individual harvests are first tested at  
524 different magnesium concentrations; those that achieve  $10^4$  RLU activity threshold are pooled. Pooled extract

525 is aliquoted, and a test aliquot is utilized to first determine ideal magnesium concentration, then ideal  
526 incubation time. Remaining aliquots are utilized for PfIVT assays at the determined magnesium & kinetic  
527 conditions.

528 **S1 File. Method for preparation and calibration of saponin.**

529 **S2 File. Method for culturing and extract generation: step-by-step protocol.**

530 **S3 File. Method for PfIVT assay: step-by-step protocol.**

531

## 532 **Figure legends**

533 **Fig 1. Optimization & quality control parameters of PfIVT extracts.** A) Translational activity of 3  
534 representative extracts (X, Y, and Z) over a range of reaction magnesium concentrations. B) Measured basal  
535 extract magnesium concentration (blue bars) and optimum translation reaction magnesium concentration (red  
536 bars) for each of 3 representative PfIVT extracts (X, Y, and Z). C) Kinetic curves for translational activity of  
537 each of 3 representative PfIVT extracts (X, Y, and Z) at the optimum reaction magnesium concentration  
538 shown in part B. Arrows indicate the timepoint to use for inhibition assays in the extracts meeting the activity  
539 threshold, indicating ~75% of saturation signal. The dashed line at  $10^4$  relative luciferase units (RLU)  
540 represents the cutoff for acceptable translational activity for the assay. Extract X does not consistently meet  
541 the  $10^4$  RLU activity threshold and would not be used for PfIVT assays.

542

543 **Fig 2. Dose-dependent inhibition of S35 incorporation and PfIVT assays by eukaryotic translation**  
544 **inhibitors.** Dose-dependent inhibition, calculated as % inhibition, of S35 incorporation (blue bars) and PfIVT  
545 assays (red bars). Name of compound, mechanism of action, and molecular structure are displayed at top of  
546 each graph. Compounds were tested at 0.1-, 1-, 10-, and 100-fold the EC50 calculated in *in vivo* growth  
547 inhibition assay, except where upper concentration was limited by solubility, indicated by \*.

548

549 **Fig 3. Dose-dependent inhibition of S35 incorporation and PfIVT assays by negative control**

550 **compounds.** Dose-dependent inhibition, calculated as % inhibition, of S35 incorporation (blue bars) and  
551 PfIVT assays (red bars) by negative control compounds: prokaryotic translation inhibitor and inhibitors of  
552 other (non-translation) cellular processes. Name of compound, mechanism of action, and molecular structure  
553 are displayed at top of each graph. Compounds were tested at 0.1-, 1-, 10-, and 100-fold the calculated EC50  
554 calculated in *in vivo* growth inhibition assay, except where upper concentration was limited by solubility,  
555 indicated by \*.

556

557 **Fig 4. Dose-dependent inhibition of S35 incorporation and PfIVT assays by antimalarial compounds.**

558 Dose-dependent inhibition, calculated as % inhibition, of S35 incorporation (blue bars) and PfIVT assays (red  
559 bars) by pre-clinical and clinically-approved antimalarial compounds. Name of compound, mechanism of  
560 action (where definitively known), and molecular structure are displayed at top of each graph. Compounds  
561 were tested at 0.1-, 1-, 10-, and 100-fold the calculated EC50 calculated in *in vivo* growth inhibition assay,  
562 except where upper concentration was limited by solubility, indicated by \*.

563

564 **Fig 5. Dose-response curves of Pf growth, PfIVT, and RRIVT for mefloquine and controls.** Dose-

565 response curves comparing inhibition, calculated as % inhibition, of *P. falciparum* growth assay (black), *P.*  
566 *falciparum in vitro* translation assay (red), and commercially available rabbit reticulocyte *in vitro* translation  
567 assay (purple). Name of compound, mechanism of action (where definitively known), and molecular structure  
568 are displayed at top of each graph.

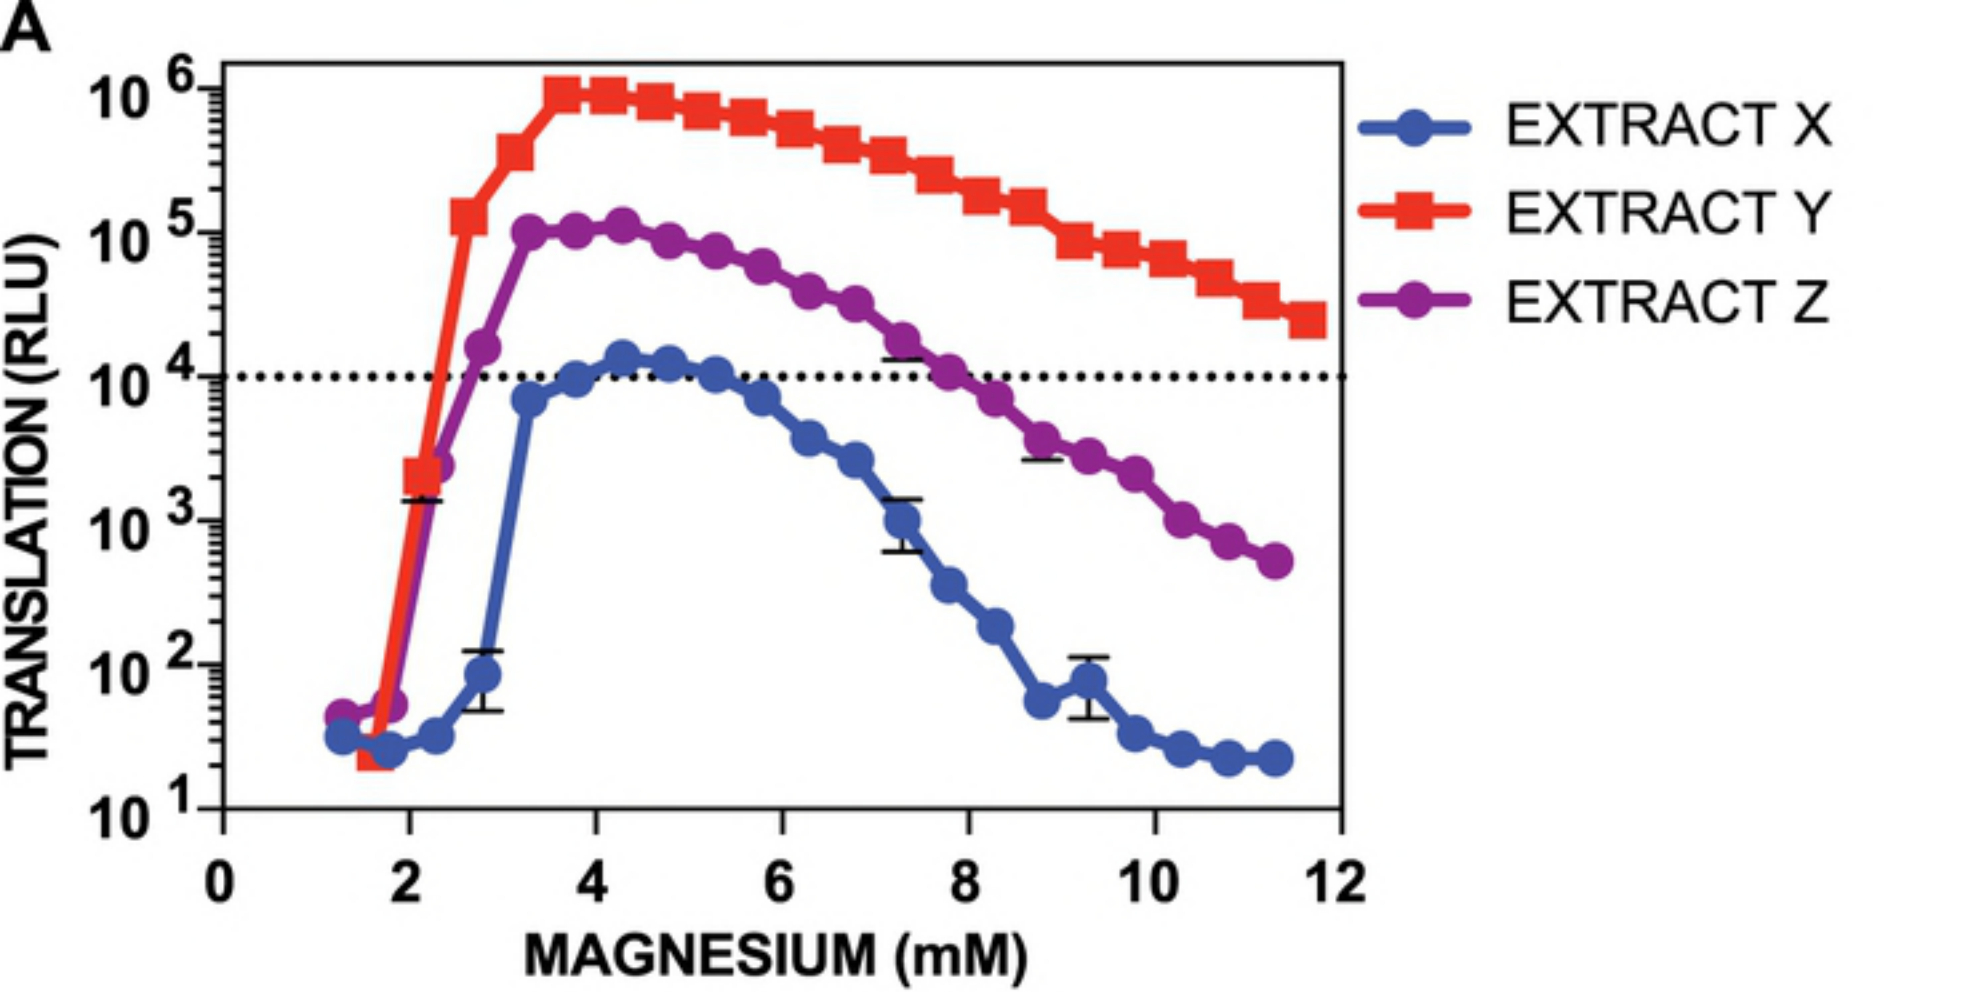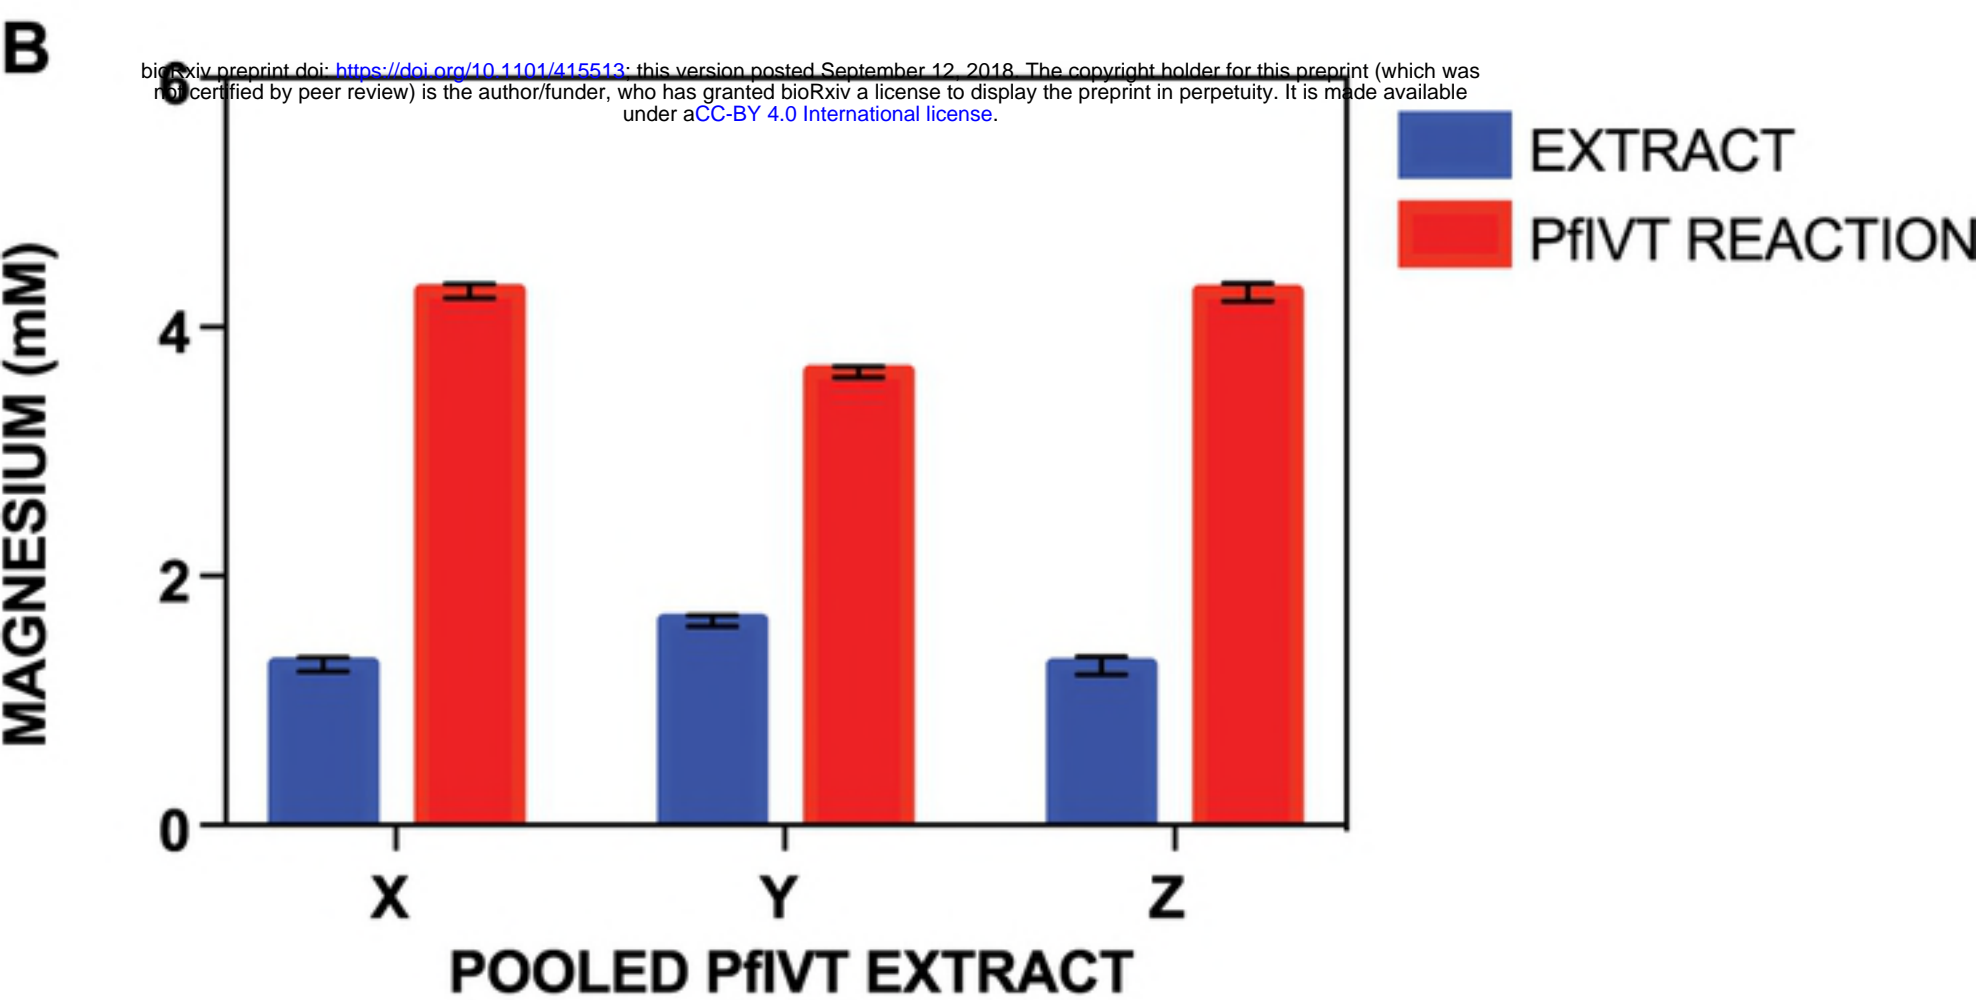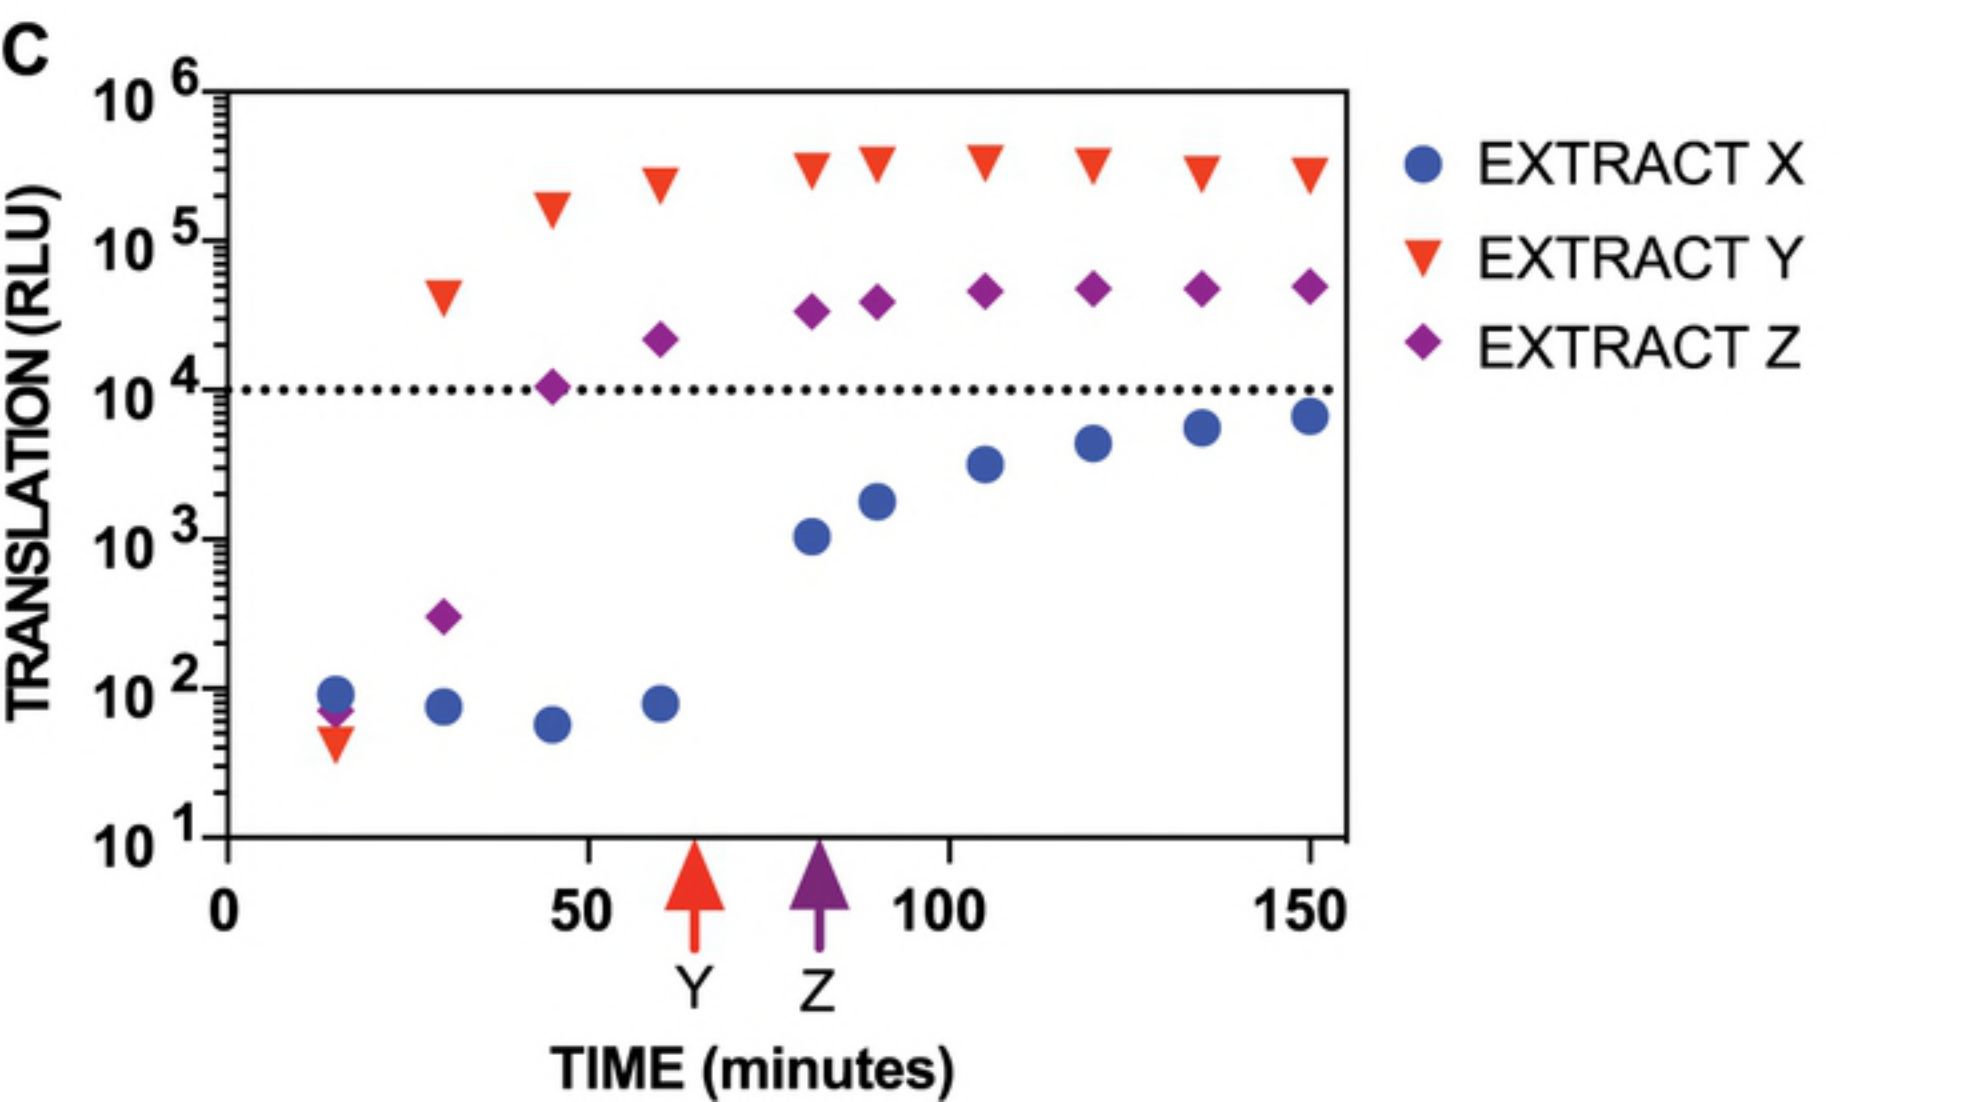

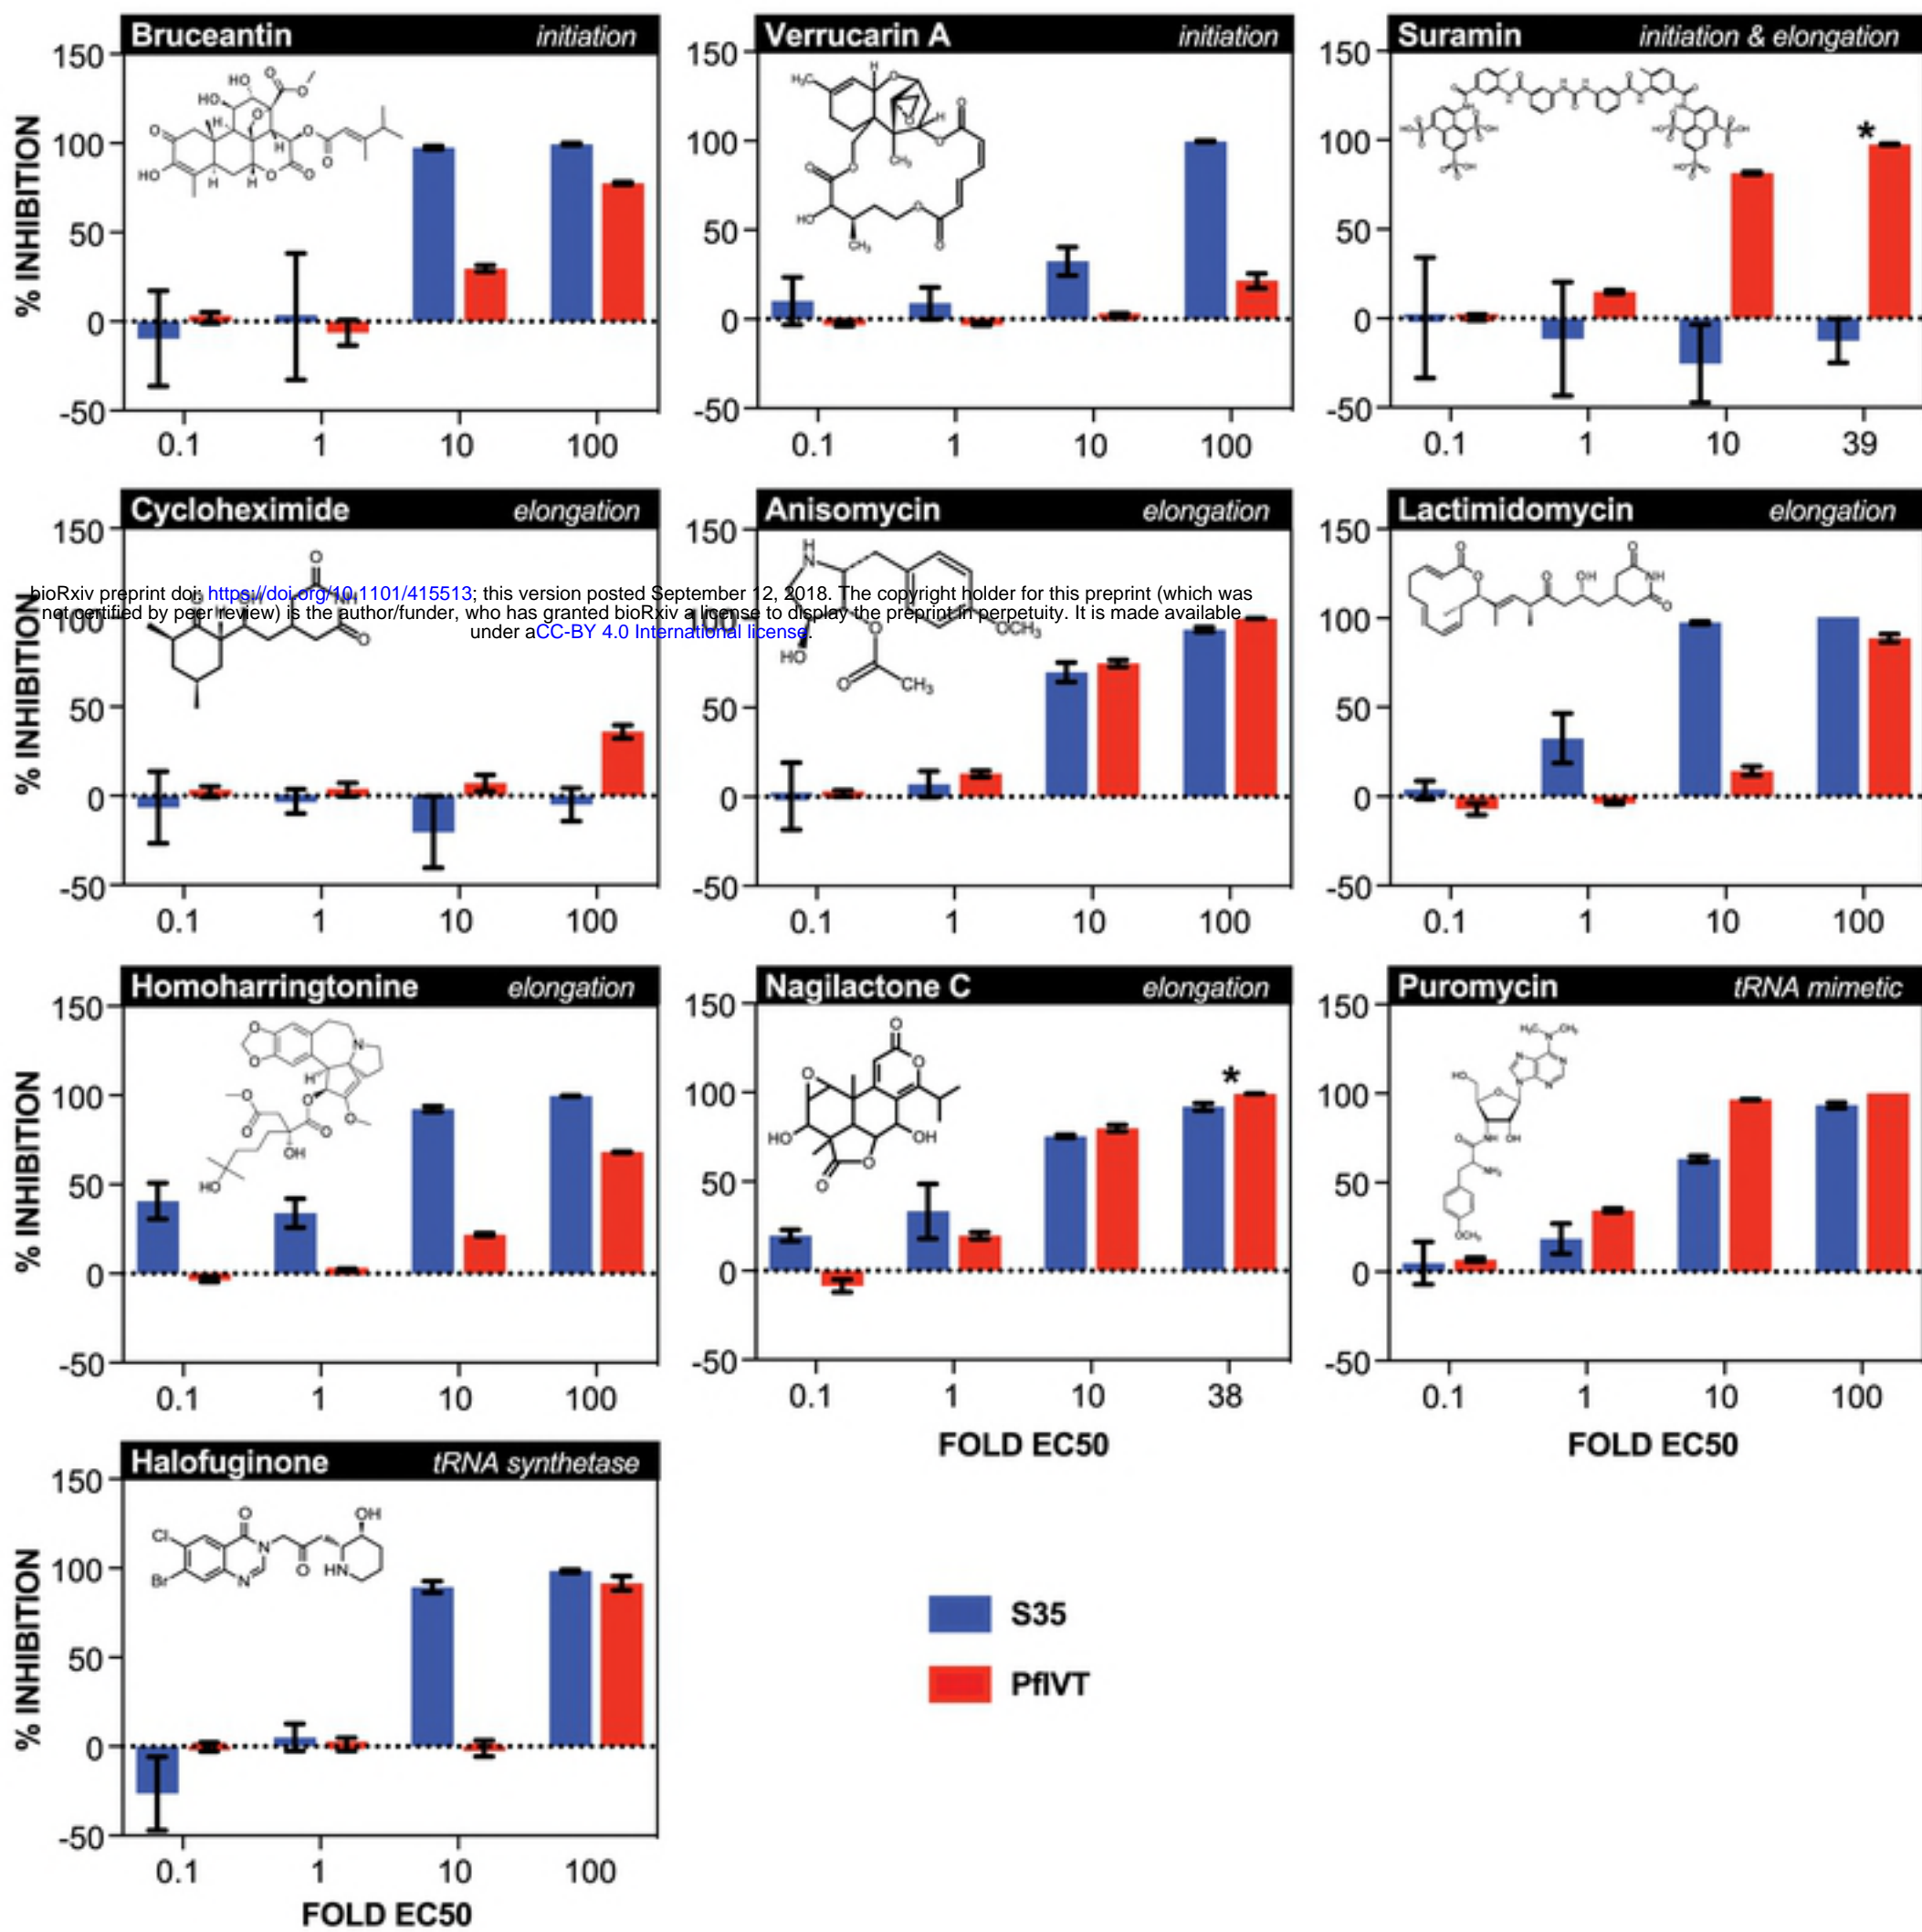

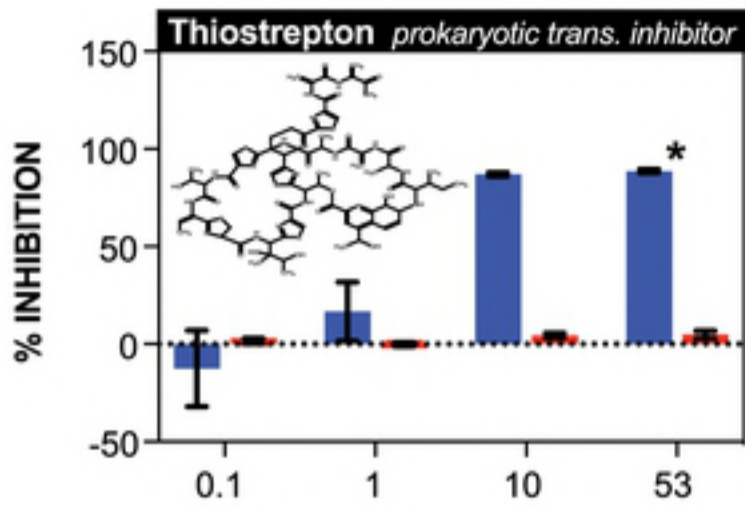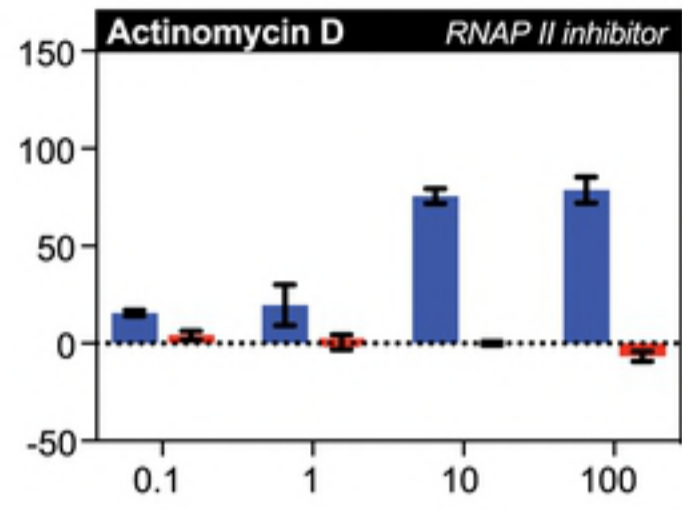

■ S35  
■ PflVT

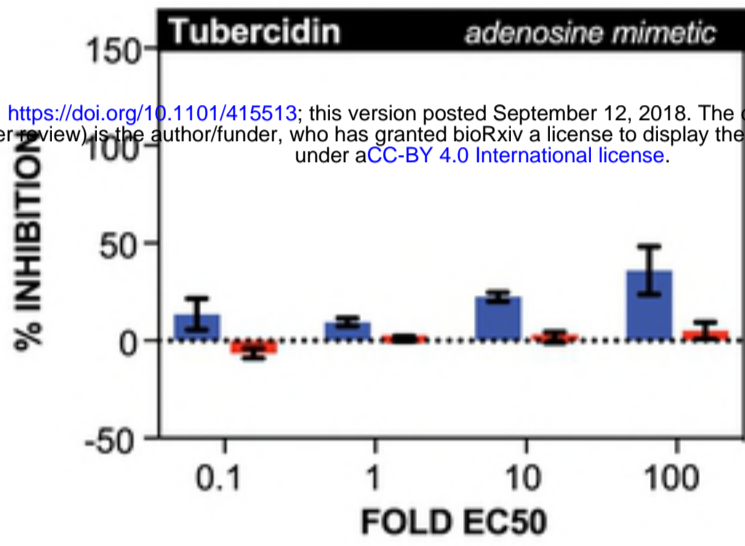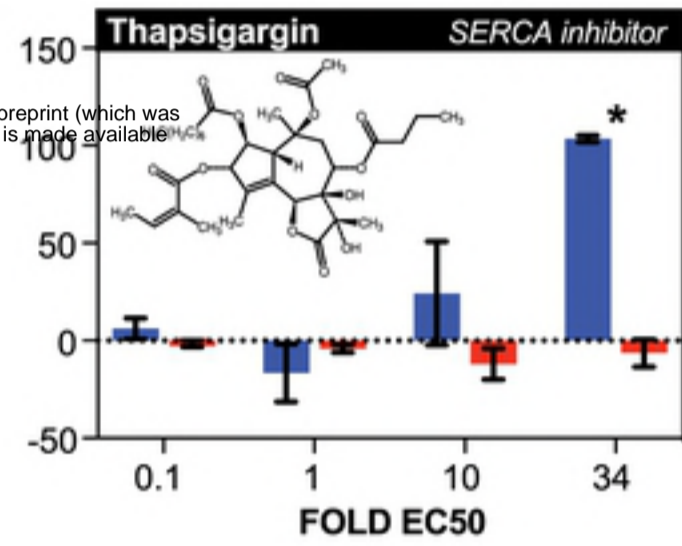

bioRxiv preprint doi: <https://doi.org/10.1101/415513>; this version posted September 12, 2018. The copyright holder for this preprint (which was not certified by peer review) is the author/funder, who has granted bioRxiv a license to display the preprint in perpetuity. It is made available under aCC-BY 4.0 International license.

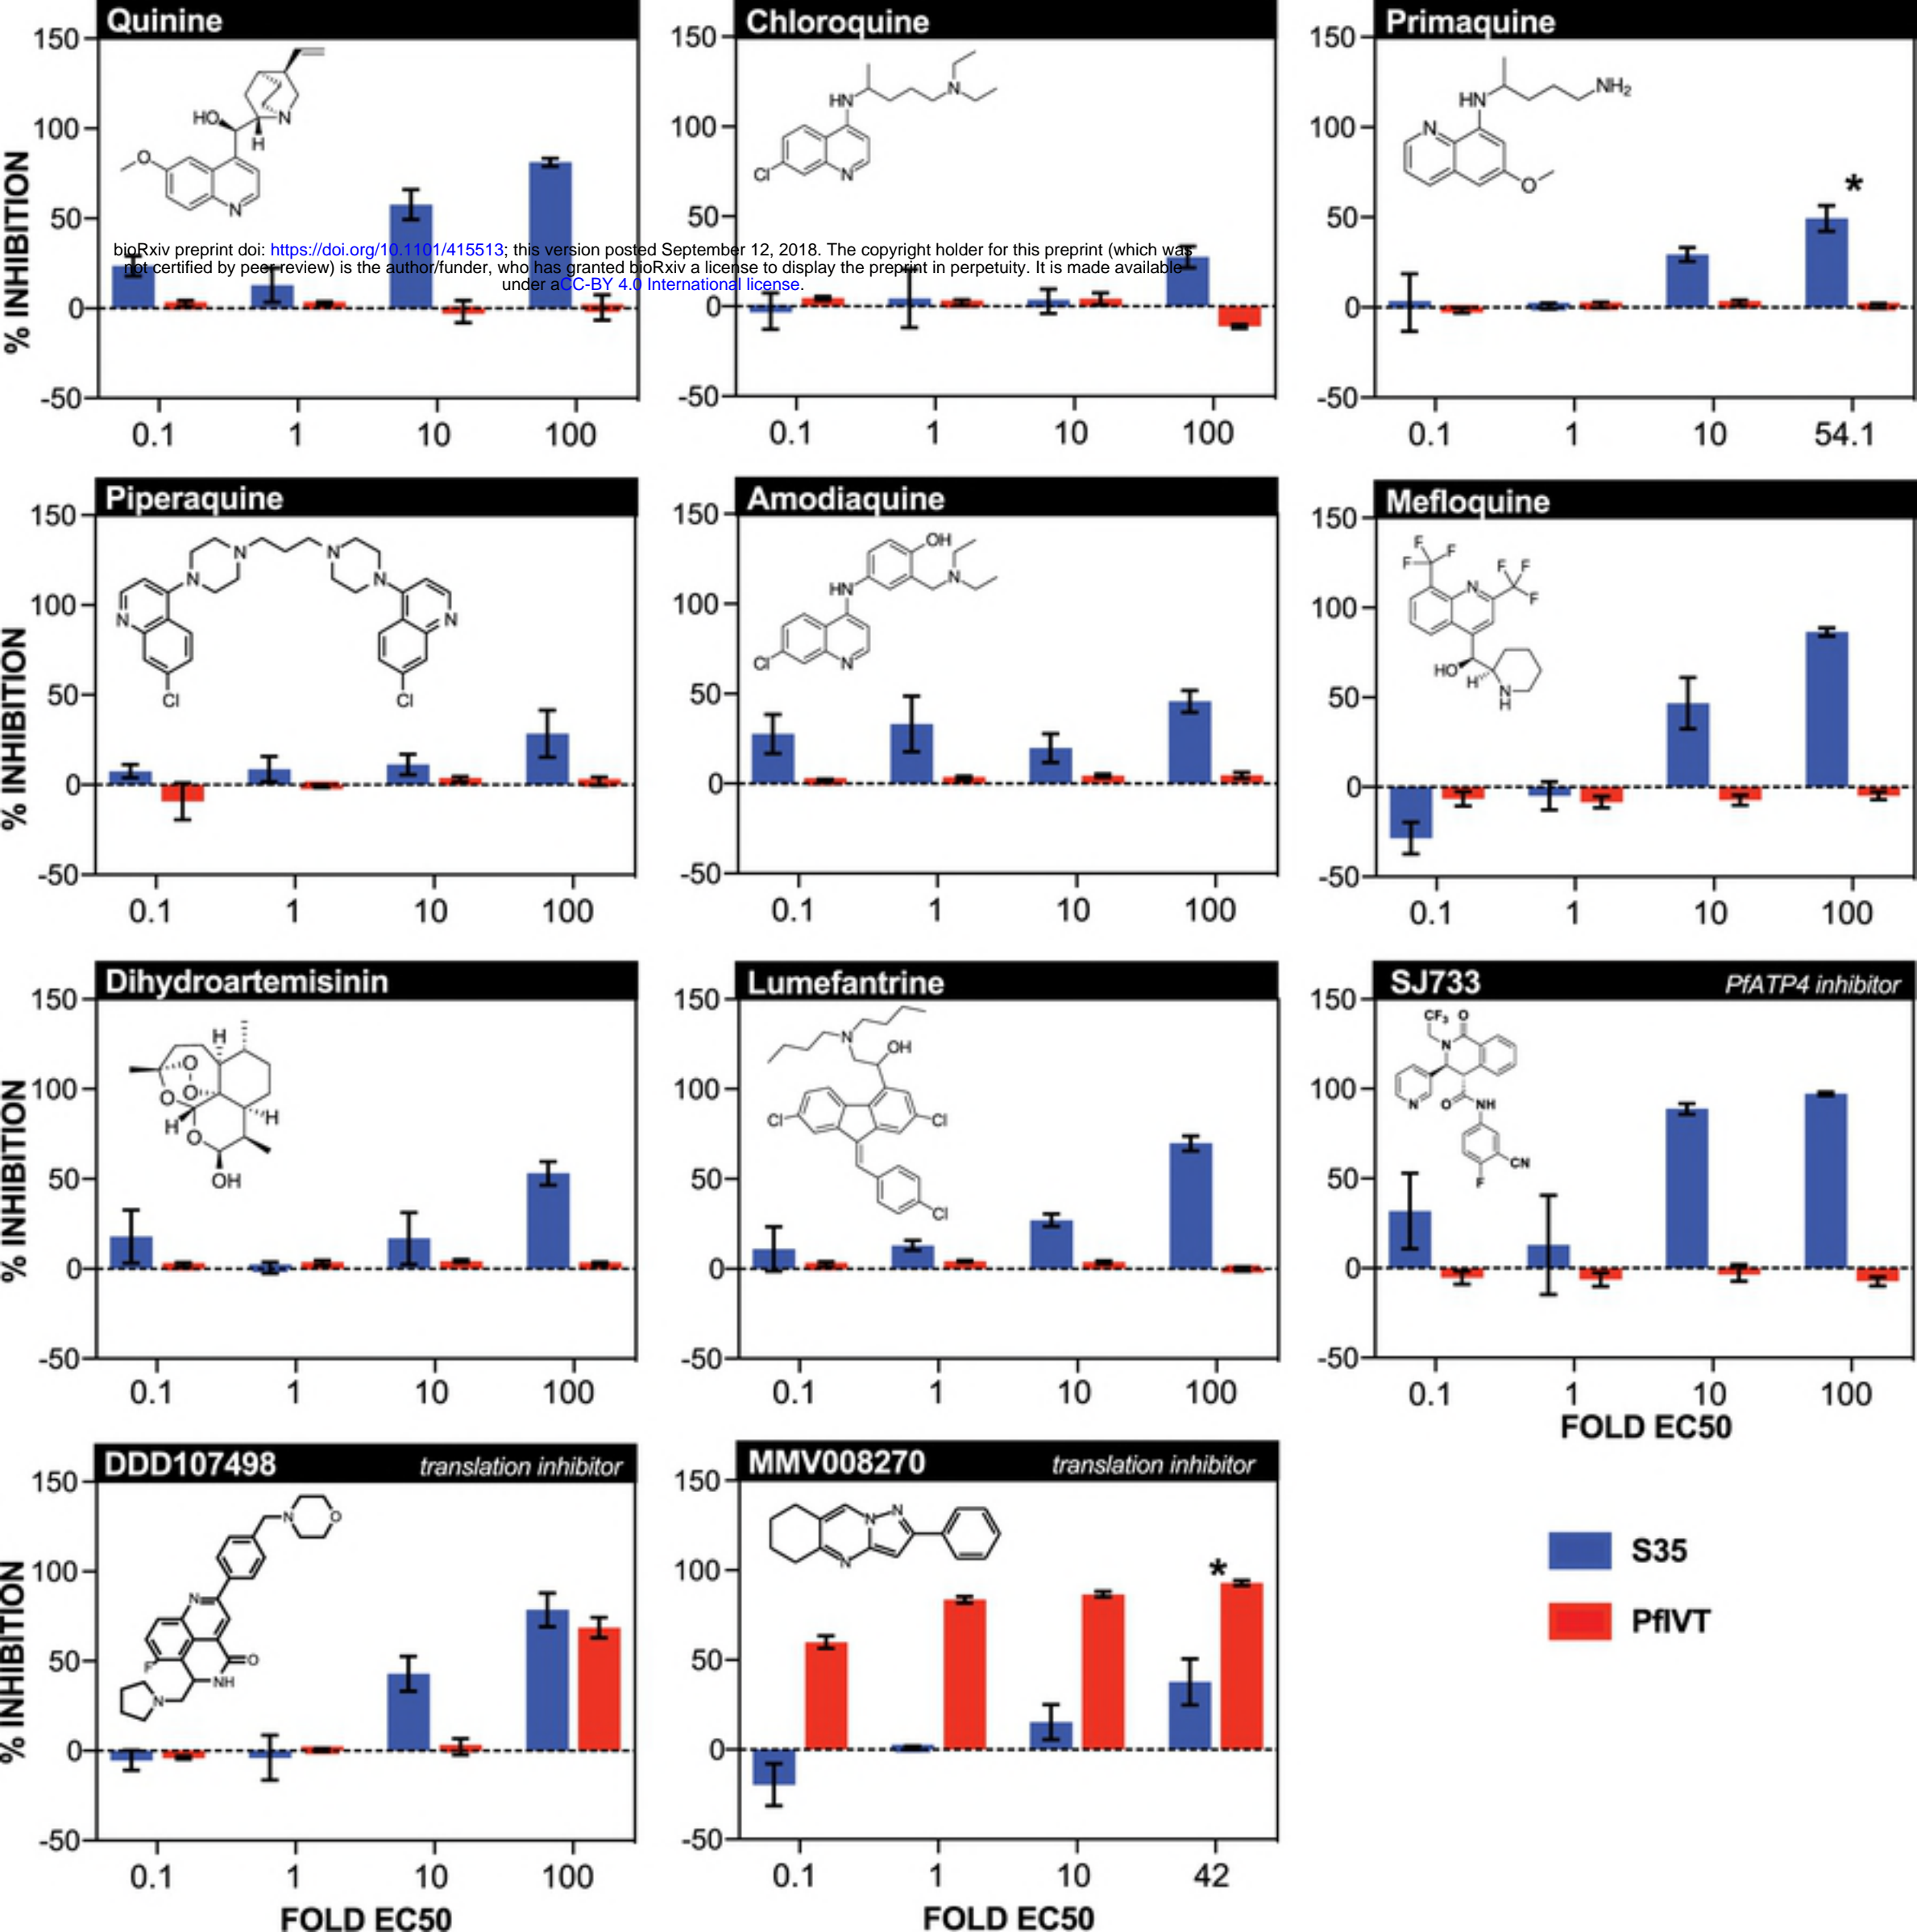

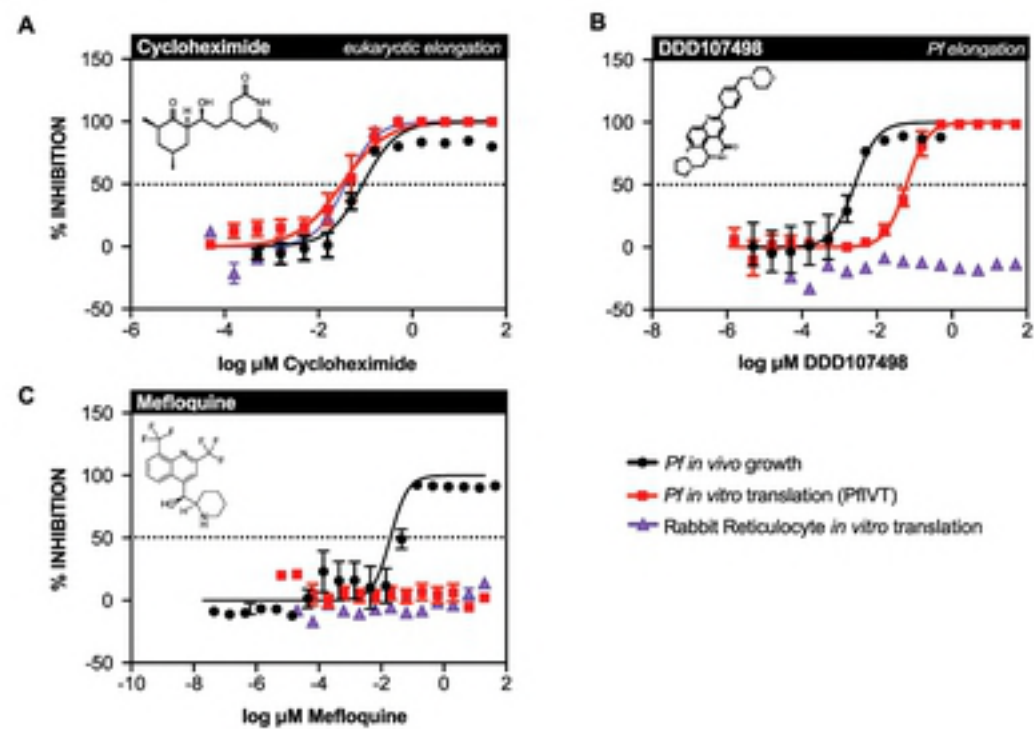

Source: https://www.biorxiv.org/content/10.1101/415513v1.full.pdf
